# Supplementary material
Source: PubMed Central journal article supplement (PMC3747762)
Supplement: supp_bjt032_Supplemental_files.pdf [file supp_bjt032_Supplemental_files.pdf]

***Supplementary Files***

**Gustatory receptor neurons in *Manduca sexta* contain a TrpA1-dependent signaling pathway that integrates taste and temperature**

Anika Afroz, Natalie Howlett, Aditi Shukla, Farah Ahmad, Elizabeth Batista, Katie Bedard, Sara Payne, Brian Morton, Jennifer H. Mansfield and John I. Glendinning

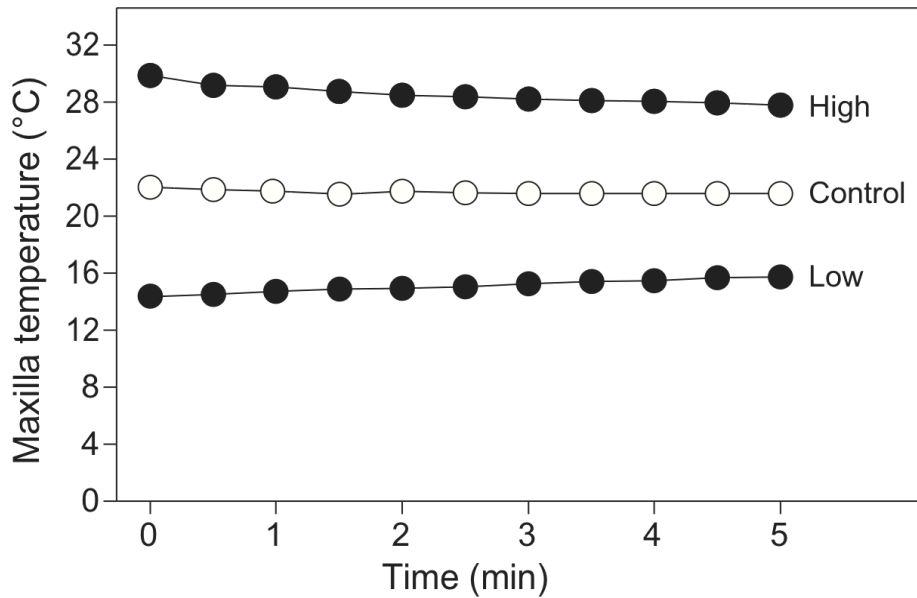

**Supplemental Figure S1.** Stability of maxilla temperature over the 5-min test sessions. Prior to each recording session, we equilibrated the maxilla at the low (14°C), control (22°C) or high (30°C) temperature. To generate each line, we recorded the temperature of each maxilla repeatedly (i.e., every 30 s) over the 5-min session. We present mean  $\pm$  S.E. (note that the error bars are too small to be visible); N = 4 maxilla per line.

**Supplemental Table S1.** Putative *M. sexta* *TrpA* and *TrpN* family members identified by comparison to sequences from other insects.

| <b>Accession number, <i>M. sexta</i><br/>predicted protein set</b> | <b>Identity</b>    |
|--------------------------------------------------------------------|--------------------|
| Msex002525                                                         | <i>MsexTrpA1</i>   |
| Msex008334                                                         | <i>MsexTrpA5-1</i> |
| Msex008339                                                         | <i>MsexTrpA5-2</i> |
| Msex008336                                                         | <i>MsexTrpA5-3</i> |
| Msex005326                                                         | <i>MsexPain</i>    |
| Msex007637                                                         | <i>MsexPyr</i>     |
| Msex003845                                                         | <i>MsexWtwr</i>    |
| Msex003842                                                         | <i>MsexWtwr2</i>   |
| Msex003507                                                         | <i>MsexTrpN</i>    |

Accession numbers for the predicted protein sequences (*Manduca* OGS proteins database, June 2012 release, [agripestbase.org](http://agripestbase.org)) are shown in the left column. We assigned putative identities based on the cluster analysis in Figure 4.
